# Supplementary material
Source: Springer Nature journal article supplement (https://www.springermedizin.de/resource/supplementary/12891_2010_1124_MOESM3_ESM.pdf/9507752)

**A**Relative PAI-1 secretion  
(% of control level)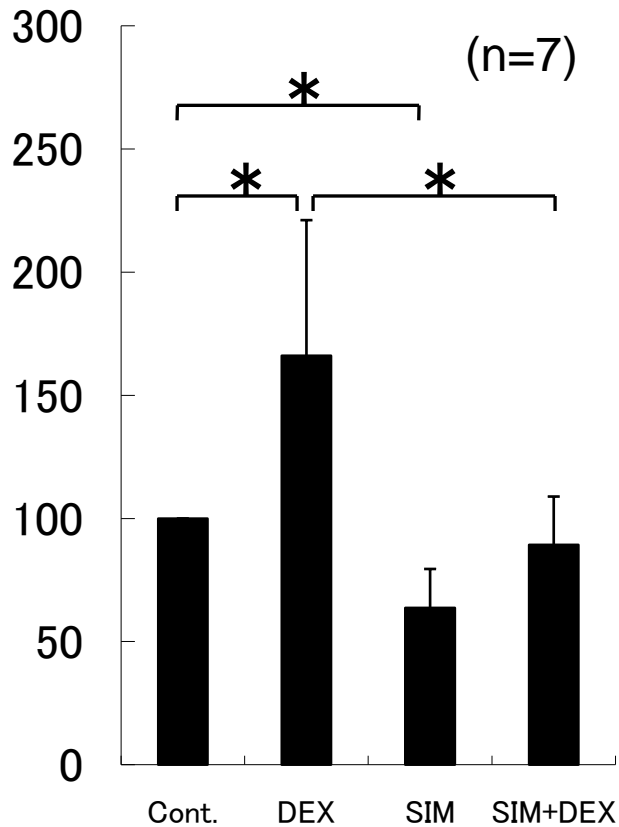**B**Relative adiponectin secretion  
(% of control level)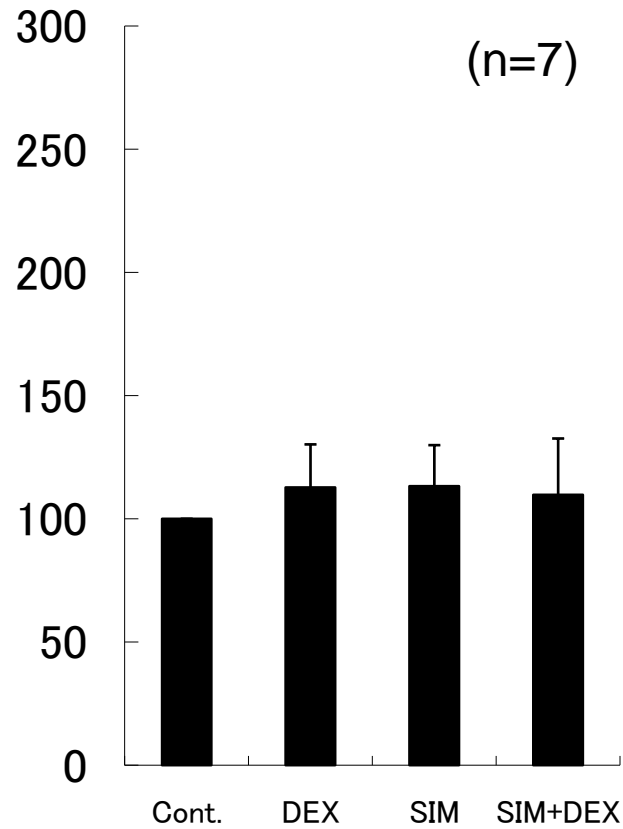

Supplement: MOESM3 [file 9507752]
